# Supplementary material for: Monitoring epidermal growth factor receptor C797S mutation in Japanese non–small cell lung cancer patients with serial cell‐free DNA evaluation using digital droplet PCR
Source: PubMed Central journal article supplement — Cancer Sci. 2021 May 2;112(6):2371–80. doi: 10.1111/cas.14879 (PMC8177776; doi:10.1111/cas.14879), 2021-05-02
Supplement: CAS-112-2371-s001.pdf [file CAS-112-2371-s001.pdf]

# Table S1

Clinical characteristics in cohort 1.

|                                                           |                                 | Total (N=26) |
|-----------------------------------------------------------|---------------------------------|--------------|
| Age (median, range)                                       |                                 | 64 (41 - 85) |
| Sex (Female / Male)                                       |                                 | 19 / 7       |
| Smoking History (never / ex-current)                      |                                 | 16 / 10      |
| Stage at diagnosis (III / IV / Post operative recurrence) |                                 | 1 / 16 / 9   |
| Histology at diagnosis (adeno / other)                    |                                 | 26 / 0       |
| Activating mutation (Ex 19 del / L858R)                   |                                 | 14 / 12      |
| Treatment history                                         | Treatment lines (1/2/≥3)        | 8/5/13       |
|                                                           | Gefitinib                       | 12           |
|                                                           | Erlotinib                       | 15           |
|                                                           | Afatinib                        | 11           |
|                                                           | Cytotoxic                       | 16           |
| Proportion of test performed                              | Tumor ddPCR                     | 19           |
|                                                           | Plasma ddPCR                    | 15           |
|                                                           | Paired (Tumor and plasma) ddPCR | 9            |
|                                                           | MET FISH                        | 8            |
|                                                           | SCLC pathological diagnosis     | 19           |
|                                                           | Tumor NGS                       | 7            |

## Table S2

Clinical characteristics in cohort 2.

|                                                     | Total (N=18)   | cfDNA positive (N=8) | cfDNA negative (N=10) | <i>p</i> |
|-----------------------------------------------------|----------------|----------------------|-----------------------|----------|
| Age (median, range)                                 | 67.5 (41 – 80) | 71 (41 – 78)         | 67 (51 - 80)          | 0.964    |
| Sex (Female / Male)                                 | 11 / 7         | 5 / 3                | 6 / 4                 | 1        |
| Smoking History (never / ex-current)                | 11 / 7         | 5 / 3                | 6 / 4                 | 1        |
| Stage at diagnosis (IV / Post operative recurrence) | 11 / 7         | 4 / 4                | 7 / 3                 | 0.63     |
| Histology at diagnosis (adeno / other)              | 18 / 0         | 8 / 0                | 10 / 0                | 1        |
| Activating mutation (Ex 19 del / L858R)             | 14 / 4         | 7 / 1                | 7 / 3                 | 0.588    |
| Extra thoracic metastasis (yes/no)                  | 9 / 9          | 6 / 2                | 3 / 7                 | 0.153    |
| Number of metastatic organ (median, range)          | 2 (1 – 3)      | 2.5 (1 - 3)          | 1 (1 - 3)             | 0.13     |
| The size of the largest lesion (mm, median, range)  | 26 (10 – 56)   | 26 (10 - 56)         | 28 (10 – 38)          | 0.732    |
| Response (PR / SD)                                  | 11 / 7         | 5 / 3                | 6 / 4                 | 1        |
| PFS (median, days)                                  | 405.0          | 390.5                | 800.0                 | 0.192    |
| TTF (median, days)                                  | 520.5          | 520.5                | 570.5                 | 0.528    |
| Number of cfDNA collection                          | 16 (4 – 22)    | 15.5 (4 – 22)        | 16 (5 - 19)           | 1        |

# Figure S1

The flow chart representing the availability of each examination.

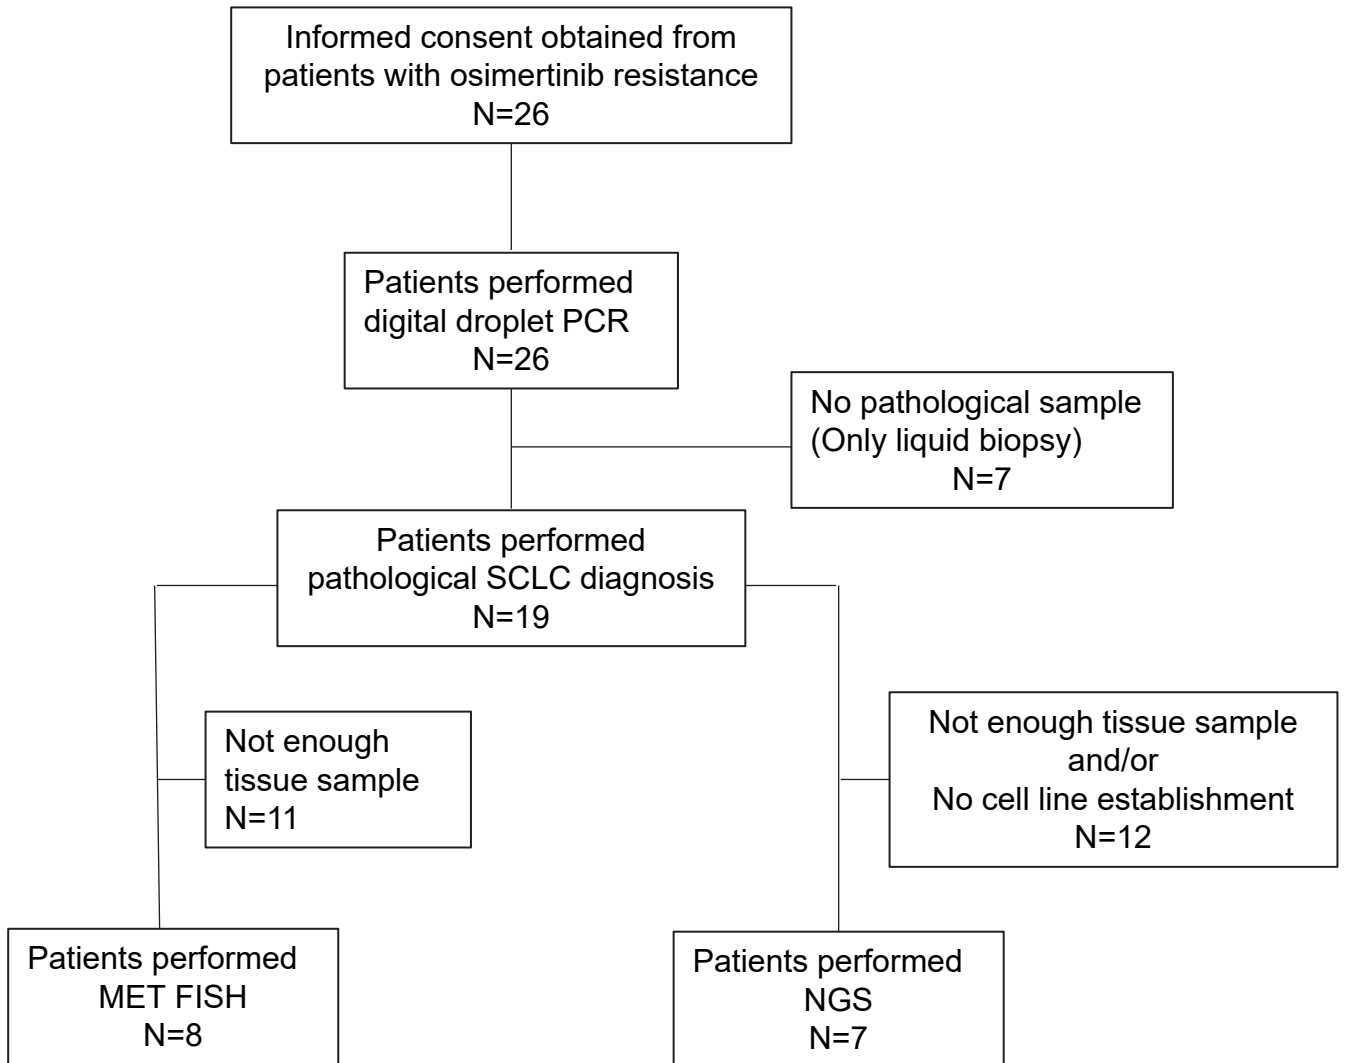

Figure S2 Summary of resistance mechanisms and treatment histories of patients.

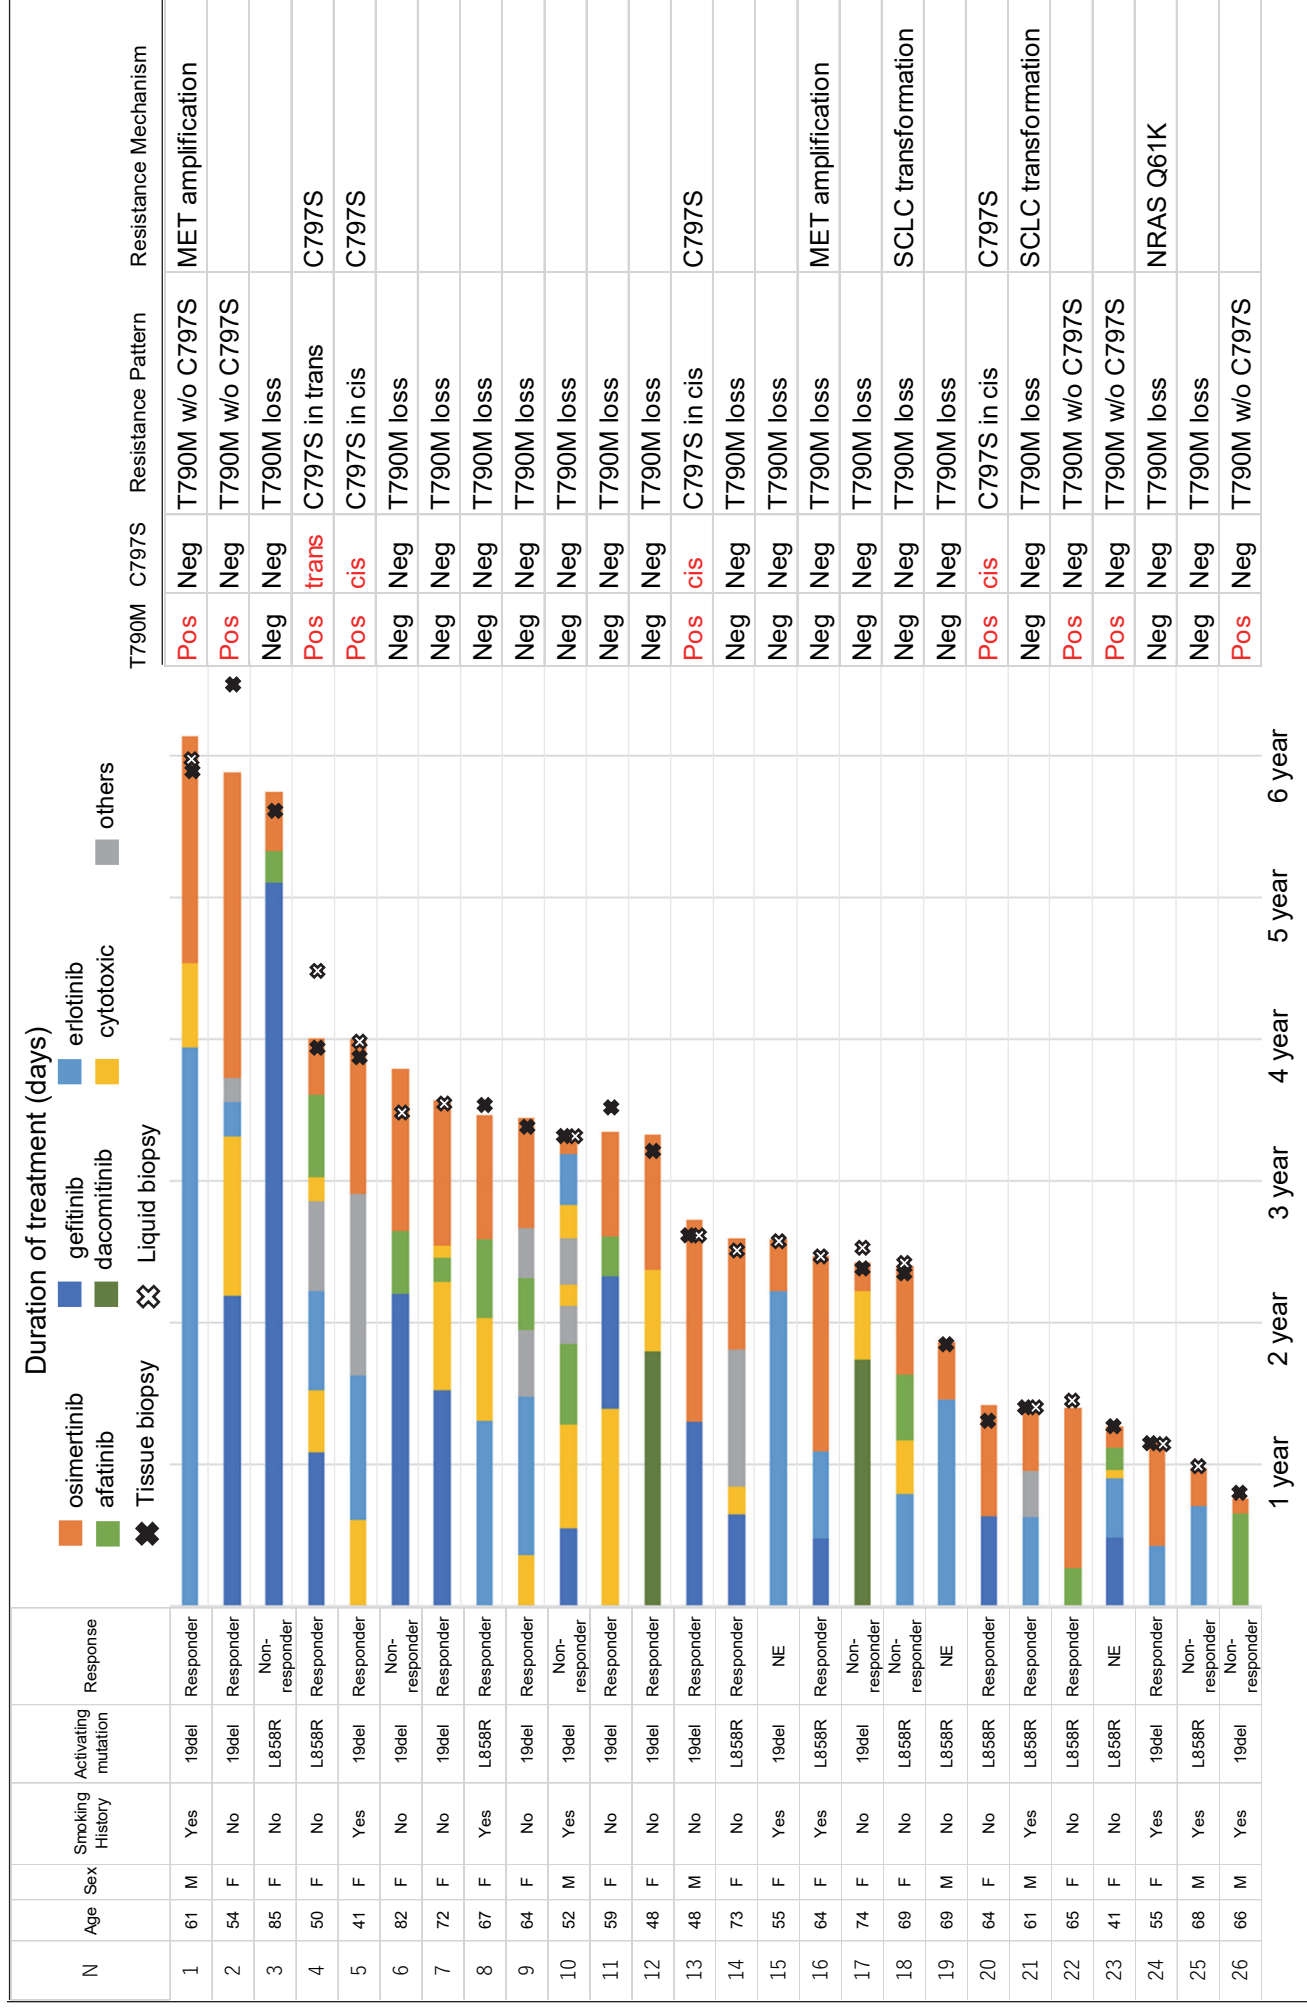



# Figure S4

IGV image of EGFR T790M and/or C797S mutation. EGFR exon 20 was PCR amplified from JFCR-129 patients and analyzed by NGS.

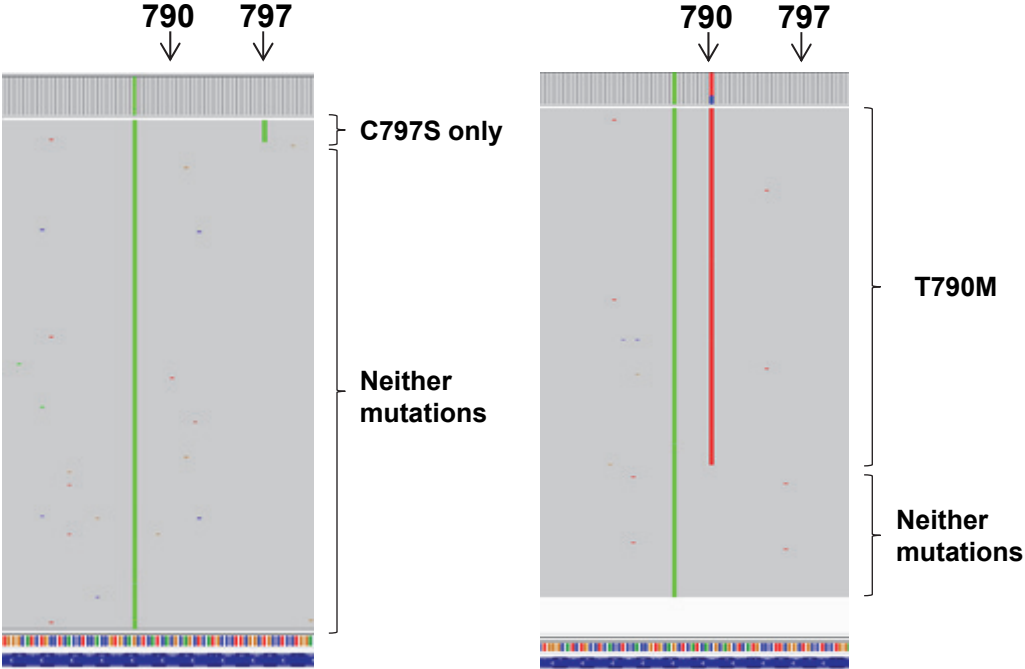

# Figure S5

(A) MET amplification with FISH. Green and red signals correspond to CEP7 and MET locus. (B) SCLC transformation was diagnosed with IHC.

(A) MET amplification with FISH

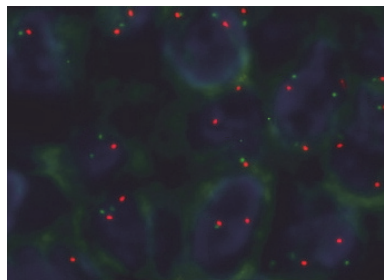

negative

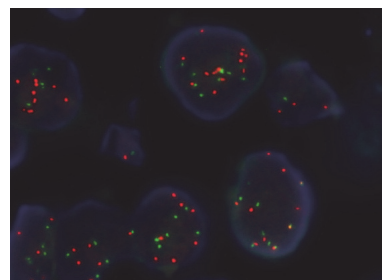

positive

(B) SCLC transformation

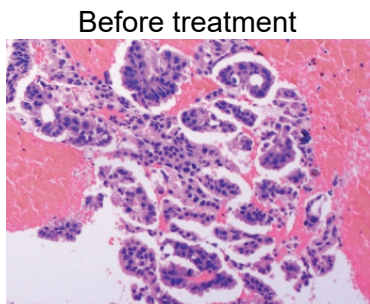

H/E

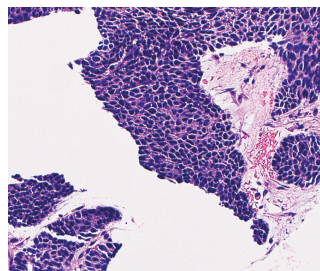

H/E

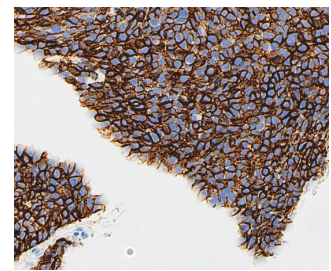

CD56

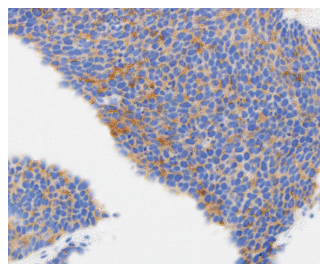

Synaptophysin

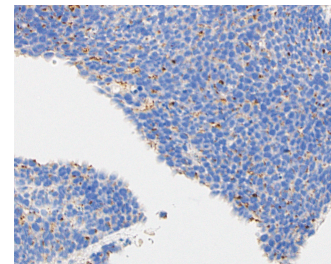

Chromogranin A
